# Supplementary material for: Siderophore-mediated iron partition promotes dynamical coexistence between cooperators and cheaters
Source: PubMed Central journal article supplement — iScience. 2023 Jul 20;26(9):107396. doi: 10.1016/j.isci.2023.107396 (PMC10494312; doi:10.1016/j.isci.2023.107396), 2023-07-20
Supplement: mmc1.pdf [file mmc1.pdf]

iScience, Volume 26

## **Supplemental information**

**Siderophore-mediated iron partition  
promotes dynamical coexistence  
between cooperators and cheaters**

**Jiqi Shao, Nan Rong, Zhenchao Wu, Shaohua Gu, Beibei Liu, Ning Shen, and Zhiyuan Li**

1 **Table S1. Symbols for our model, related to the STAR methods.**

| Chemostat parameters                                                                                                        |                                                                                                                                                                                                                                                                                                             |
|-----------------------------------------------------------------------------------------------------------------------------|-------------------------------------------------------------------------------------------------------------------------------------------------------------------------------------------------------------------------------------------------------------------------------------------------------------|
| $R_{\text{iron, supply}}$                                                                                                   | Iron supply.                                                                                                                                                                                                                                                                                                |
| $d$                                                                                                                         | Dilution rate.                                                                                                                                                                                                                                                                                              |
| Chemostat variables                                                                                                         |                                                                                                                                                                                                                                                                                                             |
| $R_{\text{sid}}$                                                                                                            | Concentration of public siderophores.                                                                                                                                                                                                                                                                       |
| $R_{\text{iron}}$                                                                                                           | Concentration of the iron.                                                                                                                                                                                                                                                                                  |
| $m_{\sigma}$                                                                                                                | Biomass density of microbe $\sigma$ .                                                                                                                                                                                                                                                                       |
| species-specific quantities                                                                                                 |                                                                                                                                                                                                                                                                                                             |
| $\vec{\alpha}_{\sigma} = (\alpha_{\sigma, \text{growth}}, \alpha_{\sigma, \text{private}}, \alpha_{\sigma, \text{public}})$ | Resource allocation strategy of microbe $\sigma$ , defined by the fractions of resources being located to growth ( $\alpha_{\sigma, \text{growth}}$ ), production of private siderophores ( $\alpha_{\sigma, \text{private}}$ ), and production of public siderophores ( $\alpha_{\sigma, \text{public}}$ ) |
| $g(R_{\text{sid}}, R_{\text{iron}}, \vec{\alpha}_{\sigma})$                                                                 | Growth rate as a function of $R_{\text{sid}}$ , $R_{\text{iron}}$ , and $\vec{\alpha}_{\sigma}$ .                                                                                                                                                                                                           |
| $I_{\sigma} = I(R_{\text{sid}}, R_{\text{iron}}, \vec{\alpha}_{\sigma_i})$                                                  | Iron intake rate per biomass of the microbe $\sigma_i$ .                                                                                                                                                                                                                                                    |
| $v_m, v_l$                                                                                                                  | Uptake coefficients for private and public siderophores, respectively. “m” stands for “membrane”, and “l” stands for “liquid”                                                                                                                                                                               |
| $K_m, K_l$                                                                                                                  | Affinity constants for private and public siderophores, respectively                                                                                                                                                                                                                                        |
| $\gamma$                                                                                                                    | Species growth coefficient.                                                                                                                                                                                                                                                                                 |
| $\beta$                                                                                                                     | Production coefficient of private siderophores.                                                                                                                                                                                                                                                             |
| $\epsilon$                                                                                                                  | Production coefficient of public siderophores.                                                                                                                                                                                                                                                              |
| $p$                                                                                                                         | Consumption ratio of public siderophores when microbes uptake iron.                                                                                                                                                                                                                                         |
| $r$                                                                                                                         | Relative biomass concentration in the cell compared to its microenvironment, set to be a constant of 100.                                                                                                                                                                                                   |

2  
3  
4  
5  
6  
7  
8

9 **Table S2. The Routh-Hurwitz table for criterion, related to the STAR methods.**

| Term ID | Values                                                          |
|---------|-----------------------------------------------------------------|
| Term 0  | $a_0$                                                           |
| Term 1  | $a_1$                                                           |
| Term 2  | $\frac{a_1 a_2 - a_0 a_3}{a_1}$                                 |
| Term 3  | $\frac{(a_1 a_2 - a_0 a_3) a_3 - a_1^2 a_4}{a_1 a_2 - a_0 a_3}$ |
| Term 4  | $a_4$                                                           |

10

11

12

13 **Table S3. Parameters used for different figures, related to Figure 1, Figure 2, Figure 3,**  
 14 **Figure 4, and the STAR methods.**

| Term            | Parameter values                                                                                                                                                                                                                                                                                                                                                                                                                                                                                          |
|-----------------|-----------------------------------------------------------------------------------------------------------------------------------------------------------------------------------------------------------------------------------------------------------------------------------------------------------------------------------------------------------------------------------------------------------------------------------------------------------------------------------------------------------|
| Basic Parameter | $\beta = 1, \gamma = 10, \epsilon = 1, K_m = 1, K_1 = 0.1, v_m = 1, v_1 = 1.$                                                                                                                                                                                                                                                                                                                                                                                                                             |
| Initial value   | In dynamical simulations, we generally set the initial value $[m_{\text{cooperator},0}, m_{\text{cheater},0}, R_{\text{sid},0}, R_{\text{iron},0}]$ as $[50, 50, 0, R_{\text{iron},\text{supply}}]$ .<br>In bifurcation simulations, we generally set the initial value $[m_{\text{cooperator},0}, m_{\text{cheater},0}, R_{\text{sid},0}, R_{\text{iron},0}]$ as $[1, 1, 0.5, R_{\text{iron},\text{supply}}]$ . $R_{\text{sid},0} = 0.5$ is set to avoid early extinction due to the high dilution rate. |
| Figure 1        | $d = 0.5, R_{\text{iron},\text{supply}} = 1.5;$<br>E: Pure cooperator: $\vec{\alpha} = (0.6, 0, 0.4);$<br>F: Partial cooperator: $\vec{\alpha} = (0.6, 0.2, 0.2).$                                                                                                                                                                                                                                                                                                                                        |
| Figure 2        | A: Partial cooperator: $\vec{\alpha} = (0.6, 0.2, 0.2), d = 0.5, R_{\text{iron},\text{supply}} = 0.5;$<br>B: Partial cooperator: $\vec{\alpha} = (0.6, 0.39, 0.01), d = 0.5, R_{\text{iron},\text{supply}} = 0.5;$<br>D: Partial cooperator: $\vec{\alpha} = (0.6, 0.2, 0.2), R_{\text{iron},\text{supply}} = 0.5;$<br>E: Partial cooperator: $\vec{\alpha} = (0.6, 0.2, 0.2), d = 0.5.$                                                                                                                  |
| Figure 3        | Partial cooperator: $\vec{\alpha} = (0.6, 0.2, 0.2), d = 0.5$<br>B: $R_{\text{iron},\text{supply}} = 0.3;$ C: $R_{\text{iron},\text{supply}} = 0.4;$ D: $R_{\text{iron},\text{supply}} = 0.6$                                                                                                                                                                                                                                                                                                             |
| Figure 4        | $d = 0.5, R_{\text{iron},\text{supply}} = 0.5,$<br>Partial cooperator: $\vec{\alpha} = (0.6, 0.2, 0.2).$<br>B: start strain: $\vec{\alpha} = (0.6, 0.2, 0.2),$ middle strain: $\vec{\alpha} = (1, 0, 0),$ end strain: $\vec{\alpha} = (0.65, 0.35, 0)$                                                                                                                                                                                                                                                    |
| S2              | Partial cooperator: $\vec{\alpha} = (0.6, 0.2, 0.2), \epsilon = 1$                                                                                                                                                                                                                                                                                                                                                                                                                                        |
| S3              | Partial cooperator: $\vec{\alpha} = (0.8, 0.1, 0.1),$<br>Pure cooperator $\vec{\alpha} = (0.99, 0, 0.01).$<br>B: $R_{\text{iron},\text{supply}} = 0.1 ;$ C: $R_{\text{iron},\text{supply}} = 0.16 ;$ D: $R_{\text{iron},\text{supply}} = 0.18 ;$ E: $R_{\text{iron},\text{supply}} = 0.25$                                                                                                                                                                                                                |
| S4              | $d = 0.5, R_{\text{iron},\text{supply}} = 0.5$                                                                                                                                                                                                                                                                                                                                                                                                                                                            |
| S5              | $d = 0.5, R_{\text{iron},\text{supply}} = 0.5$                                                                                                                                                                                                                                                                                                                                                                                                                                                            |
| S6              | $d = 0.5, R_{\text{iron},\text{supply}} = 1$<br>Partial cooperator: $\vec{\alpha} = (0.6, 0.2, 0.2)$                                                                                                                                                                                                                                                                                                                                                                                                      |
| S7              | $d = 0.5, R_{\text{iron},\text{supply}} = 1$                                                                                                                                                                                                                                                                                                                                                                                                                                                              |

15  
 16  
 17

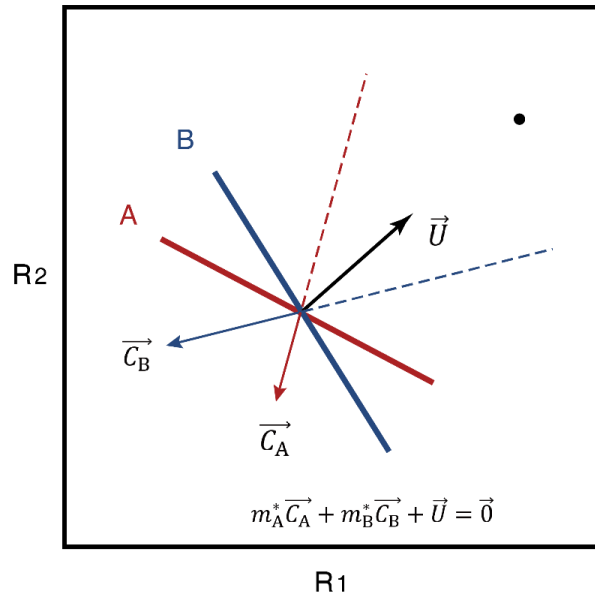

18

19 **Figure S1. Diagram of the Tilman's graphical tools on the classical consumer resource**  
 20 **model, related to the STAR methods.** In the chemical space expanded by two resources  
 21  $R_1$  and  $R_2$ , The Tilman's graphical tool in analyzing resource competition model contains: (1)  
 22 resource supply point  $[R_{1,supply}, R_{2,supply}]$  (black dot) , which sets the maximal possible  
 23 concentration of  $R_1$  and  $R_2$  that can occur at steady state; (2) resource supply vector  $\vec{U}$   
 24 (black arrow), which denotes the environmental supply rate of resources and  $\vec{U} =$   
 25  $d \begin{bmatrix} R_{1,supply} - R_1^* \\ R_{2,supply} - R_2^* \end{bmatrix}$  at steady state; (3) zero net growth isocline(ZNGI), or growth contour  
 26  $\{(R_1, R_2) \mid \frac{dm_i}{dt} = 0\}$ , for each strain (strain A: red line; strain B: blue line), which shows the  
 27 contour where growth rate equals to death or dilution rate; (4) consumption vector (red and  
 28 blue arrows for that of strain A  $\vec{C}_A$ , and stain B  $\vec{C}_B$ , respectively), which indicates the total  
 29 consumption rate of resources for the species. When two species reach a steady state,  
 30  $m_A^* \vec{C}_A + m_B^* \vec{C}_B + \vec{U} = \vec{0}$ . The consumption vectors and growth contours in this figure show that  
 31 each of species A and species B consumes more of the one resource which more limits its  
 32 own growth rate, leading to stable coexistence.

33

34

35

36

37

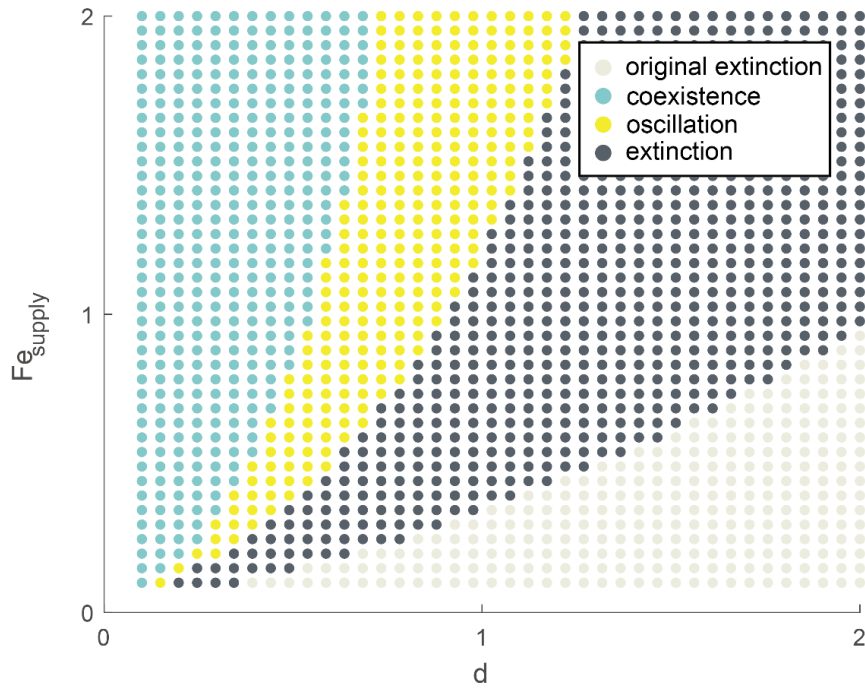

38

39 **Figure S2. Cheaters accelerate the collapse of the system when invading partial**  
 40 **cooperators, related to Figure 2.** Consequence of the pure cheater invading the partial  
 41 cooperator  $\vec{\alpha} = (0.6, 0.2, 0.2)$  under various chemostat conditions. Light gray denotes  
 42 chemostat conditions in which the partial cooperator cannot survive even on its own. Deep  
 43 gray indicates regions where partial cooperators can exist on their own, yet the invasion of  
 44 cheaters drives them to extinction. The yellow dots represent oscillatory dynamics, while the  
 45 blue zone represents coexistence.

46

47

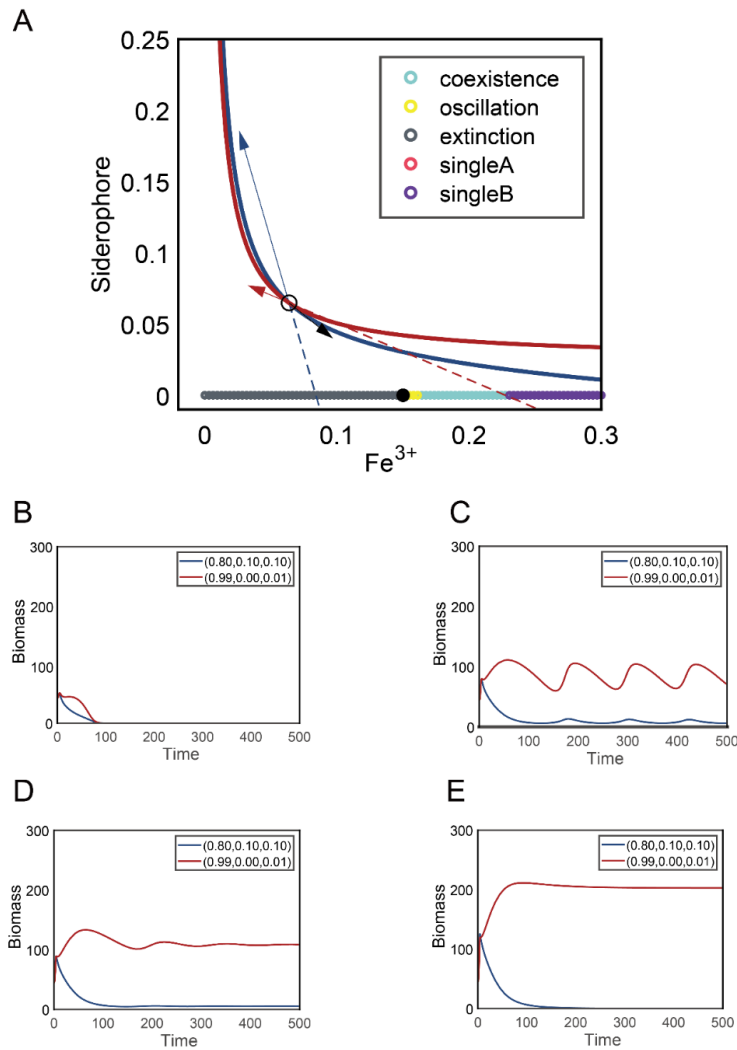

49

50 **Figure S3. Competition between two cooperators under different Fe supply, related to**  
 51 **Figure 3, and the STAR methods.** Similar as Figure 3 in the main text, but the system  
 52 consists of two cooperators competing for iron. The strategies of the partial cooperator A is  
 53  $\vec{\alpha}_A = (0.8, 0.1, 0.1)$ , and the nearly-pure cooperator B is  $\vec{\alpha}_B = (0.99, 0, 0.01)$ . (A) As the iron  
 54 supply increases, the systems dynamics experiences extinction, oscillation, coexistence, and  
 55 strain B excluding strain A, respectively. The interior of the reverse extension of the  
 56 consumption vector covers the supply region where coexistence is possible, while the exterior  
 57 is the region where exclusion occurs and the cooperator B survives alone. (B-E) Time-courses  
 58 of the competition dynamics between strain A and strain B under increasing iron supply, as  
 59 shown in (A). (B):  $R_{iron,supply} = 0.1$ ; (C):  $R_{iron,supply} = 0.16$ ; (D):  $R_{iron,supply} = 0.18$ ; (E):  
 60  $R_{iron,supply} = 0.25$ .

61

62

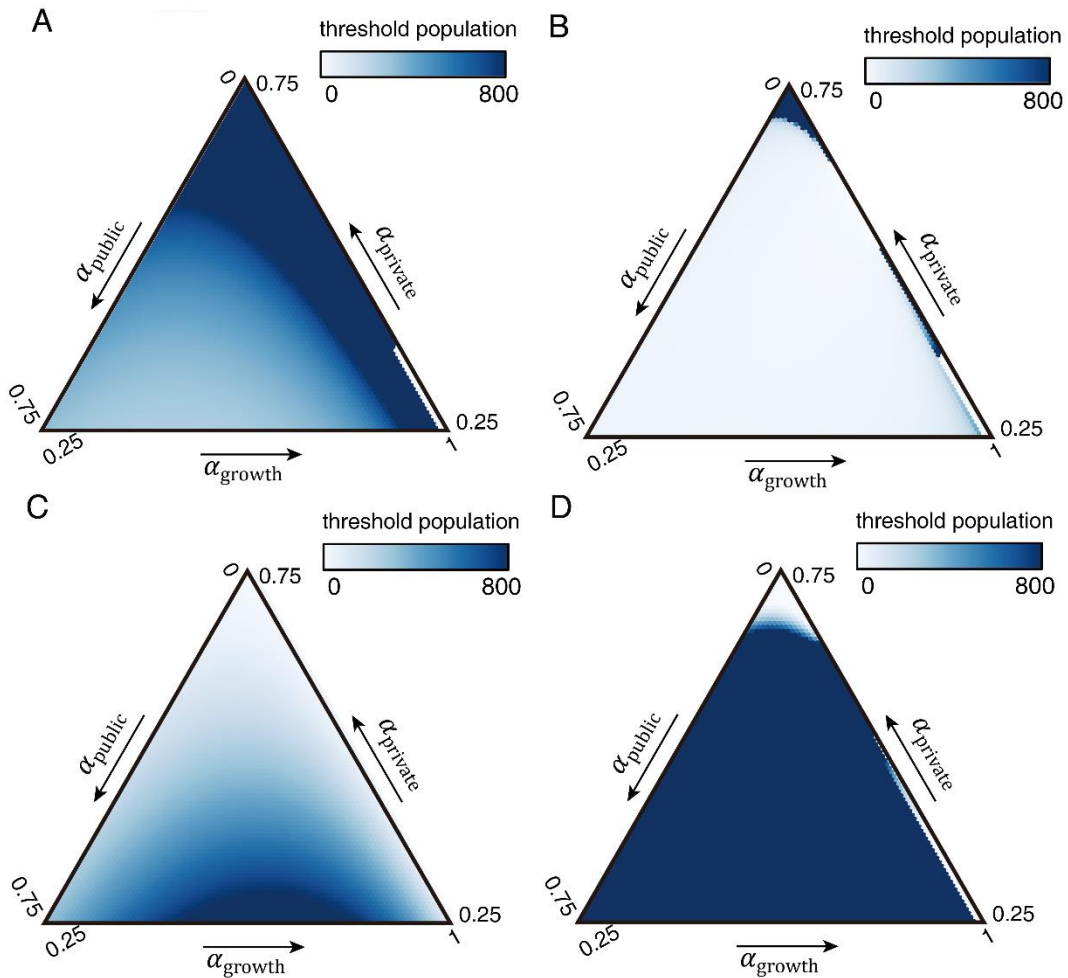

63

64 **Figure S4. The invasion from another species with non-overlapping siderophores,**  
 65 **related to Figure 4.** To assess a species' resistance to invasion by other species with different  
 66 forms of siderophores, we modeled a second species with the same parameters but non-  
 67 sharable siderophore. To assist the differentiation, we refer to the native species as species  
 68 1 and the invading species as species 2. (A) The minimum population required for all  
 69 strategies of species 2 to invade a native species 1 under the partial cooperator strategy  
 70 ( $\vec{\alpha}_1 = (0.6, 0.2, 0.2)$ ). (B) The minimum population required for all strategies of species 2 to  
 71 invade a native species 1 under the self-supplier strategy ( $\vec{\alpha}_1 = (0.6, 0.4, 0)$ ). (C) The minimum  
 72 population required for a species 2 under the partial cooperator strategy ( $\vec{\alpha}_2 = (0.6, 0.2, 0.2)$ )  
 73 to invade all strategies of species 1. (D) The minimum population required for a species 2  
 74 under the self-supplier strategy ( $\vec{\alpha}_2 = (0.6, 0.4, 0)$ ) to invade all strategies of species 1.

75

76

77



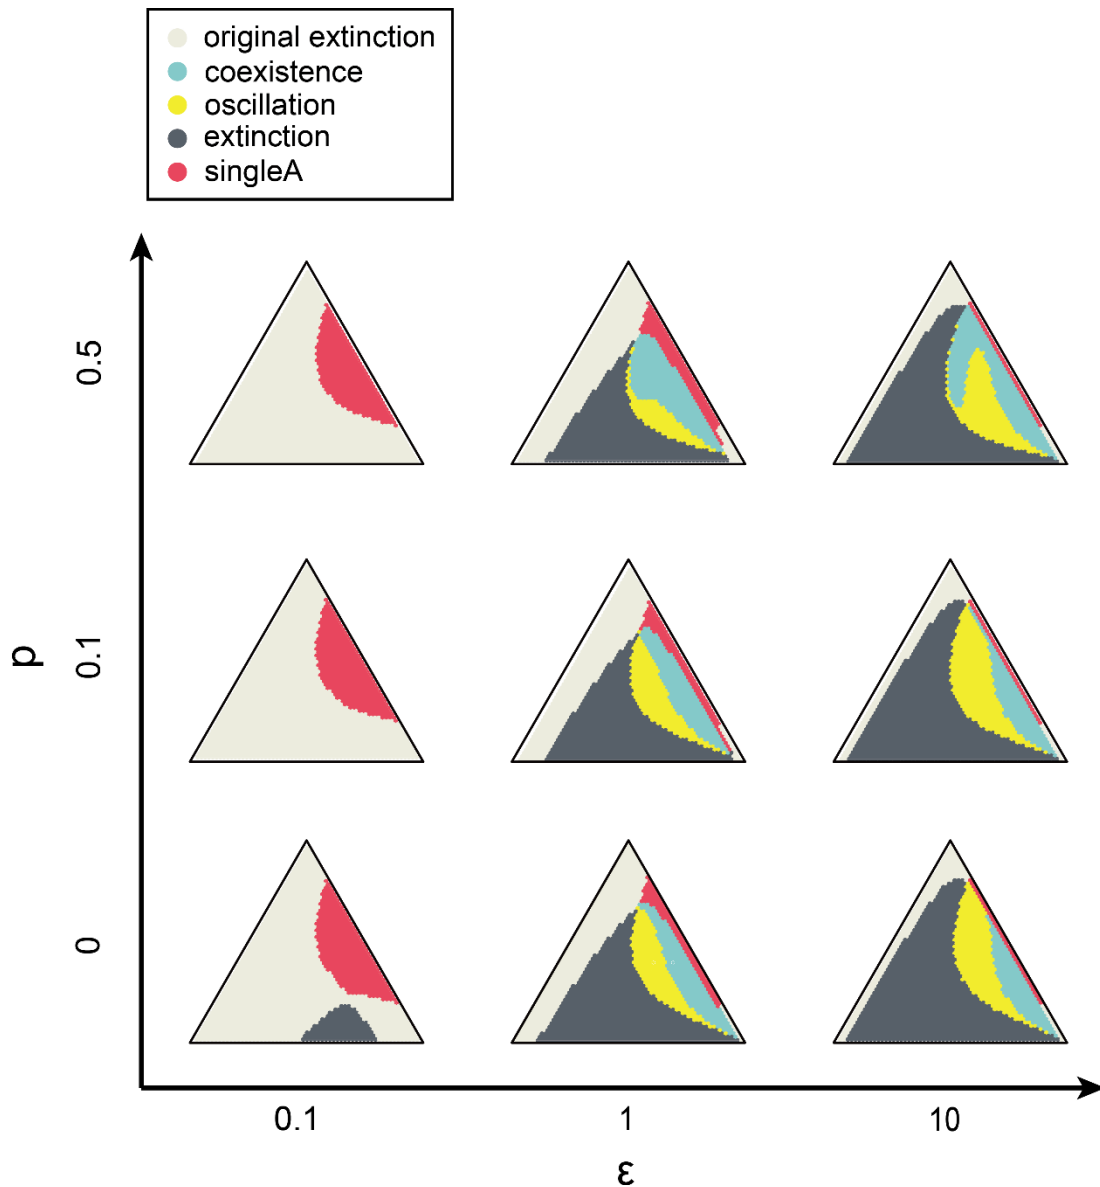

78

79 **Figure S5. The impact of consumption, production, and recycle rate of public**  
 80 **siderophores on strategies' interaction consequences with the pure cheater, related to**  
 81 **Figure 4, and the STAR methods.** To quantify the effects of siderophores' production cost  
 82 (represented by  $\epsilon$ ) and recycle rate (represented by  $p$ ) on its coexistence with the cheater,  
 83 here we set up different combinations of  $\epsilon$  and  $p$  to reproduce Figure 4A. Along the x-axis,  
 84 decreasing the production cost of public siderophores, i.e., larger  $\epsilon$ , helps to substantially  
 85 enlarge the area of oscillation (yellow) and stable coexistence (blue) instead of exclusion (red).  
 86 Along the y-axis, increased siderophore consumption, i.e., larger  $p$ , slightly increased the  
 87 area of stable coexistence.

88

89

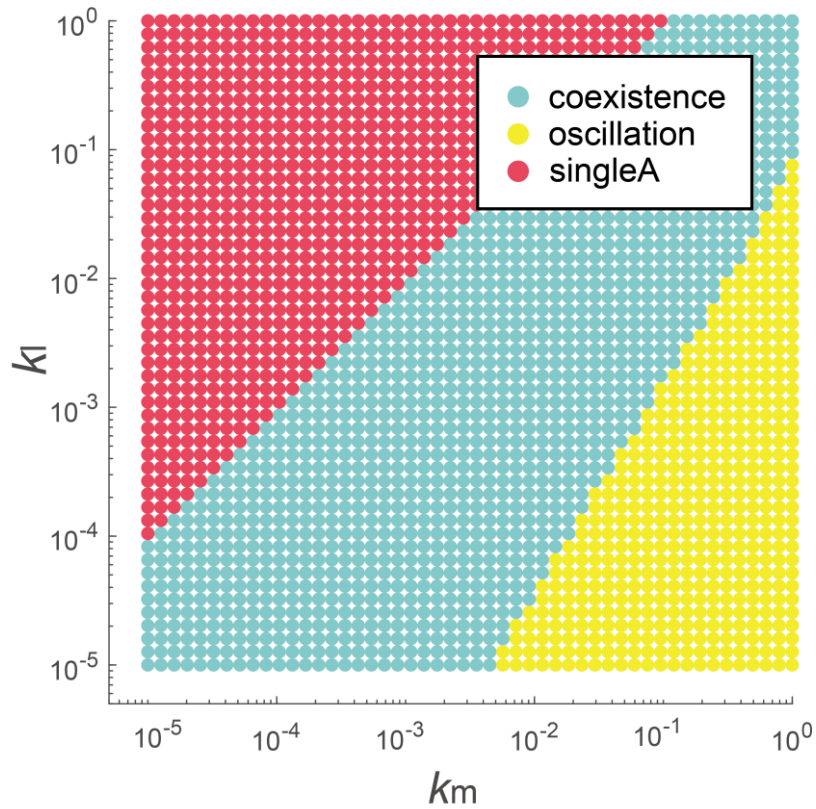

90

91 **Figure S6. The impact of iron affinity of private and public siderophores on coexistence**  
 92 **between the partial cooperator and the pure cheater, related to Figure 4, and the STAR**  
 93 **methods.**  $K_m$  and  $K_l$  denote iron affinity of private and public siderophores, respectively.  
 94 The consequence of the pure cheater invading a partial cooperator ( $\vec{\alpha}_A = (0.6, 0.2, 0.2)$ ), termed  
 95 as “strain A”) under different levels of  $K_m$  and  $K_l$  were mapped to dot colors in the phase  
 96 plane. Partial cooperators can stably coexist with pure cheaters in a wide range of parameter  
 97 combinations, when  $K_m$  balances with  $K_l$  (blue dots). When  $K_l$  decreases and  $K_m$   
 98 increases, i.e., public siderophores increase affinity for iron, the system is more likely to  
 99 oscillate (yellow dot). When  $K_l$  increases and  $K_m$  decreases, the partial cooperator is more  
 100 likely to exclude the cheater (red dots denoted as “single A”).

101

102

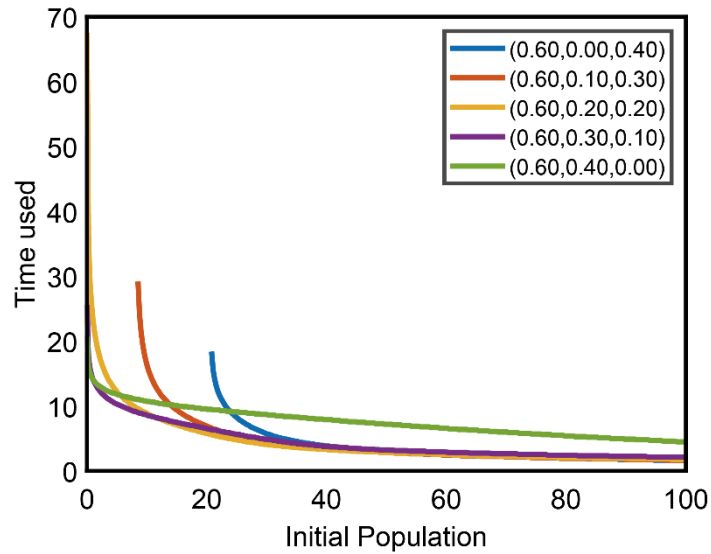

103

104 **Figure S7. Speed of reaching a population's steady-state size for various strategies**  
 105 **and initial populations, related to Figure 4.** In order to measure the speed of population  
 106 establishment, we quantified the time used between introducing the initial population and  
 107 reaching the steady-state population. Assuming constant  $\alpha_{\text{growth}}$ , self-suppliers and partial  
 108 cooperators that allocate more resources to private siderophores can establish a population  
 109 faster with a smaller initial population size, whereas strategies that allocate more resources  
 110 to public siderophores can achieve the same or even faster results when the initial population  
 111 size increases.
